# Supplementary material for: Epigenetic Alterations in DCIS Progression: What Can lncRNAs Teach Us?
Source: MDPI journal article supplement (doi:10.3390/ijms24108733), 2023-05-13
Supplement: s1 [file s1]

## Supplementary files

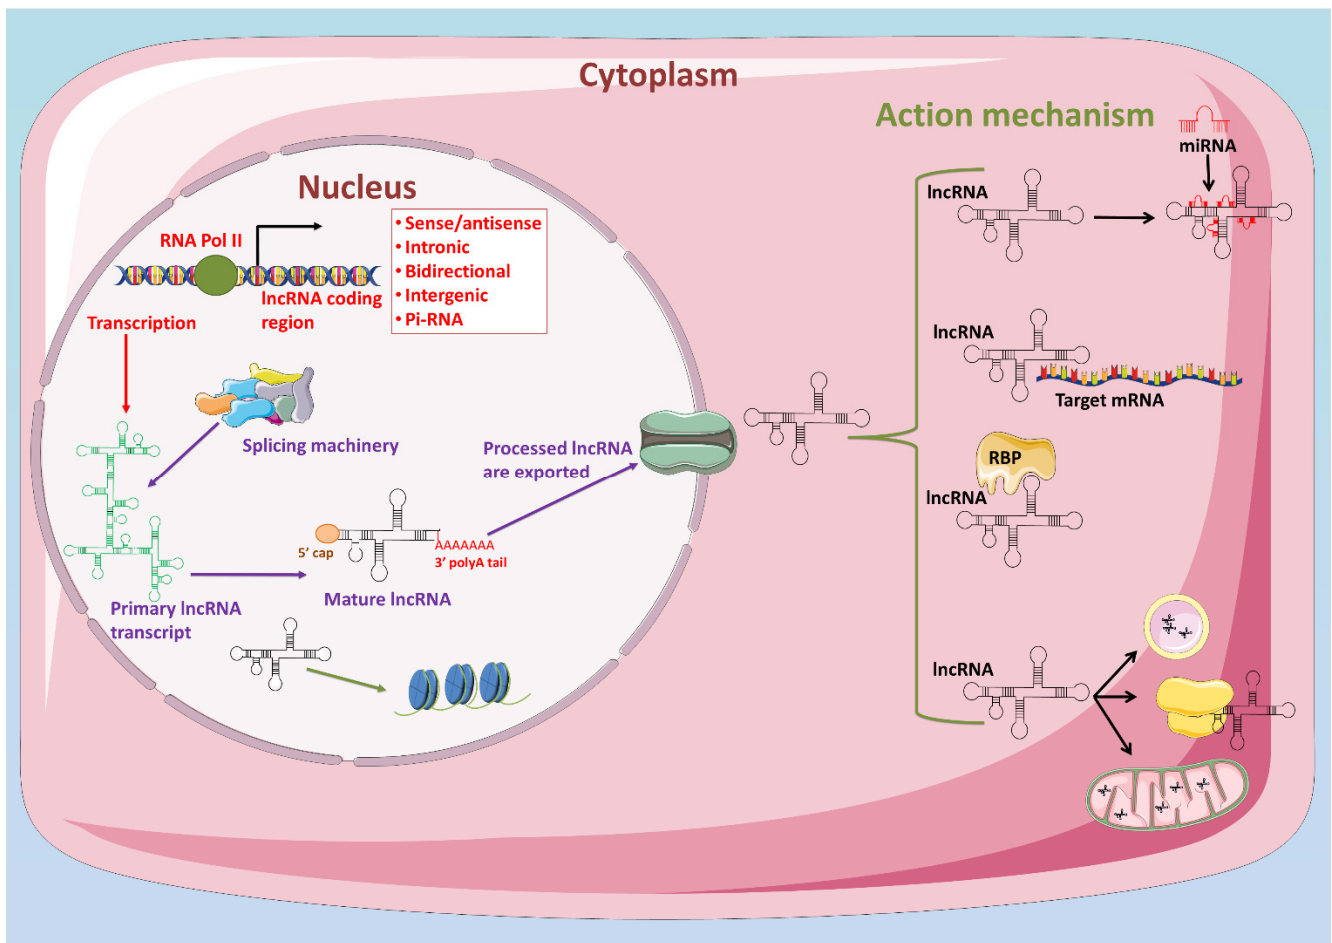

**Figure S1. lncRNA biogenesis and function.** lncRNAs are transcribed by RNA Polymerase II. Immature lncRNA molecules undergo splicing processing similar to messenger RNA (mRNA). Effective processing culminates in the formation of a mature lncRNA molecule containing a capped 5' end (5' UTR) and a polyadenylated 3' end (poly A tail). The processed lncRNA molecule is exported to the cytoplasm, where it can have different fates, many of which are relatively unknown. Mature lncRNAs can interact with and regulate other molecules, including RNA molecules (miRNAs and even mRNAs). Mature lncRNAs can also interact with diverse RNA-binding proteins (RBPs) and associate with ribosomes through 'pseudo' 5' untranslated regions (UTRs). Several lncRNAs are sorted into mitochondria and can also be found in other organelles, such as exosomes; this recruitment of lncRNAs is accomplished by unknown mechanisms. lncRNAs that are inefficiently processed are retained in the nucleus. They can remain on chromatin and bind to chromatin-modifying complexes and direct them to a specific target, activating or repressing the target.

**Table S1.** Landscape regulation of lncRNA in DCIS

| lncRNA               | Modulation of molecular pathways and process                                                                                                      | Premalignant phenotypic alteration                 | In vivo / in vitro alterations                                                                          | Modulation of neighboring genes | Target gene           | References  |
|----------------------|---------------------------------------------------------------------------------------------------------------------------------------------------|----------------------------------------------------|---------------------------------------------------------------------------------------------------------|---------------------------------|-----------------------|-------------|
| <b>HOTAIR</b>        | Drug resistance; EMT, AP1, HIF1A; Autophagy                                                                                                       | Growth; Invasion; Migration; Proliferation         | Recurrence score; Increased in more aggressive DCIS lesions; Upregulated between normal breast and DCIS | N.D                             | N.D                   | [48, 52-55] |
| <b>LINC00885</b>     | CDK6; MYC; ERBB; P53; EREG                                                                                                                        | Growth; Motility and migration; Cell proliferation | N.D                                                                                                     | N.D                             | N.D                   | [59]        |
| <b>BHLHE40-AS1</b>   | IL-6 / STAT3                                                                                                                                      | Increased invasive potential; Invasion; Migration  | Immuno-permissive microenvironment; Disease progression; Upregulated between early-stage DCIS and IBC   | N.D                             | N.D                   | [66]        |
| <b>MALINC1</b>       | Ap1; Cell adhesion; Tumor microenvironment remodeling; Extracellular matrix organization; Cell proliferation; Innate and adaptive immune response | N.D                                                | Modulation of molecular pathways and process                                                            | N.D                             | N.D                   | [72, 73]    |
| <b>RP11-379F4.4</b>  | NF-kB                                                                                                                                             | N.D                                                | Potential indicator of DCIS-IBC progression                                                             | STAT                            | RARRES1               | [88]        |
| <b>RP11-465B22.8</b> | NF-kB                                                                                                                                             | N.D                                                | Potential indicator of DCIS-IBC progression                                                             | STAT                            | miR-200b;<br>miR-200b | [88]        |

\* N.D = Not Determined.
